# Supplementary material
Source: PubMed Central journal article supplement (PMC7346764)
Supplement: NIHMS1568998-supplement-Supplementary_Figs_and_Tables.pdf [file NIHMS1568998-supplement-Supplementary_Figs_and_Tables.pdf]

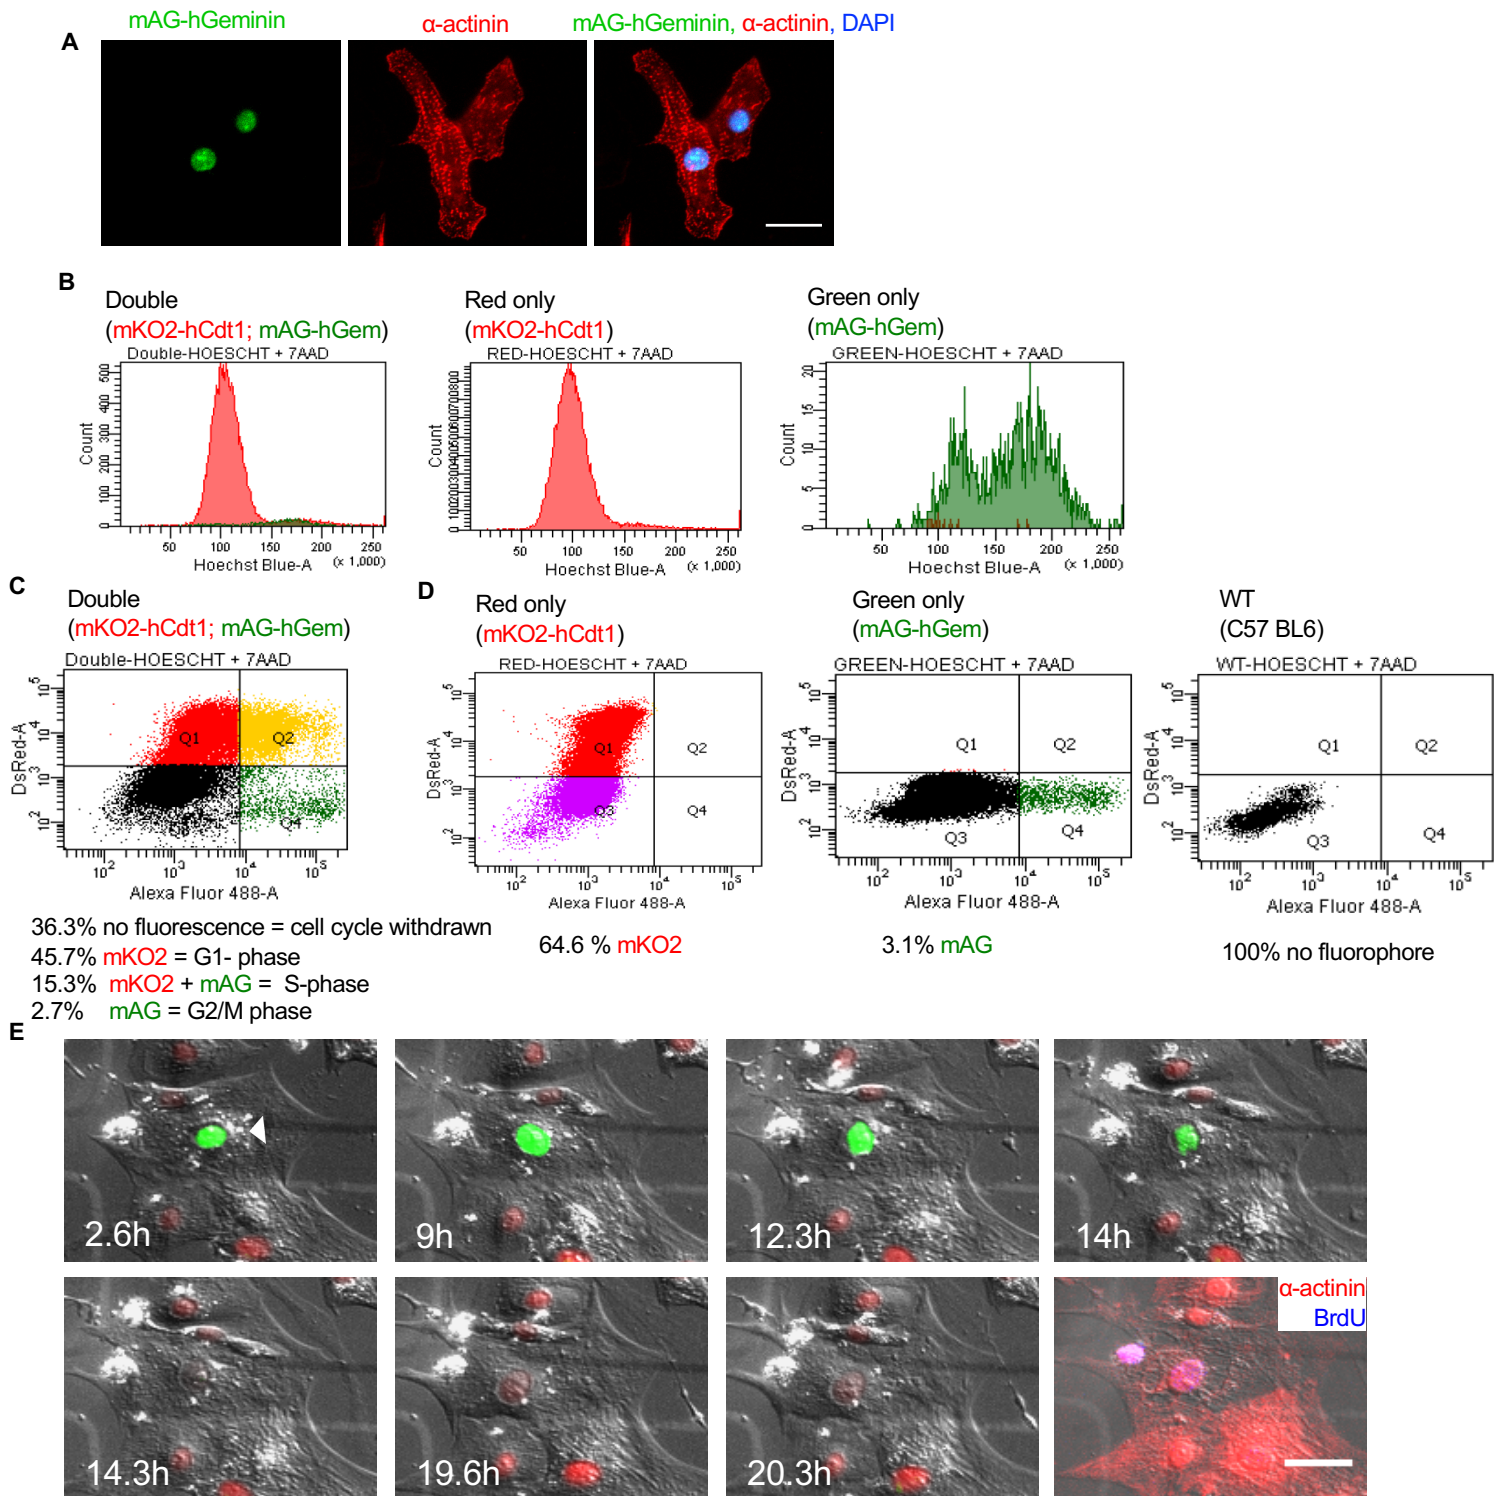

**Supplemental Figure S1. Related to Figure 1. The Fucci cell cycle reporter system identifies cell cycle phases and can be used to quantify the percentage of cardiomyocytes in each phase (G1 vs. S vs. G2/M) in neonatal mice (P1).** We isolated cardiomyocytes from P1 mice positive for both Fucci transgenes (Double, i.e., mKO2-Cdt1 and AG-hGeminin) to quantify the percentage of cardiomyocytes in the different phases of the cell cycle (G1 vs S vs G2/M) at birth (P1). **(A)** Immunofluorescence microscopy shows that neonatal (P1) cardiomyocytes express AG-Geminin. **(B)** Cells were analyzed by FACS. To increase the purity of the cardiomyocyte population, gates for size and granularity were applied and dead cells (by 7-AAD staining) and doublets were excluded. **(C)** The percentages of cells expressing mKO2 (indicating G1-phase), mKO2 + mAG (indicating S-phase), or mAG (indicating G2/M-phase) were calculated. The majority (45.7%) of cycling cardiomyocytes expressed mKO2, indicating cells in G1-phase; 15.3% of cardiomyocytes expressed both mKO2 and mAG, indicating S phase. Only 2.7% of cardiomyocytes expressed mAG only, indicating G2/M. **(D)** In addition, cardiomyocytes were isolated from pups positive for only the mKO2-hCdt1 (Red only) or mAG-hGem (Green only) transgene to evaluate the consistency of Fucci expression percentages at P1. It was found that 64.6% of cardiomyocytes isolated from Red only pups were expressing mKO2, indicating both G1 and S phase. This correlates with 45.7% (G1) + 15.3% (S) = 61% of cardiomyocytes expressing mKO2 from the Double isolation. As expected, only 3.1% of cardiomyocytes isolated from Green only pups were expressing mAG, indicating S phase and G2/M. As negative control, cardiomyocytes were isolated from P1 wild type C57BL6 pups, with 100% expressing no fluorophore. In conclusion, although the percentage of cardiomyocytes in G2/M at any given time is relatively low in neonatal mice, the mAG-Geminin reporter readily identifies it. **(E)** Time-lapse images of isolated cardiomyocytes from mKO2-hCdt1; mAG-hGem pup at P1. The cardiomyocytes are further validated by immunofluorescent staining with  $\alpha$ -actinin. Scale bar 30  $\mu$ m.

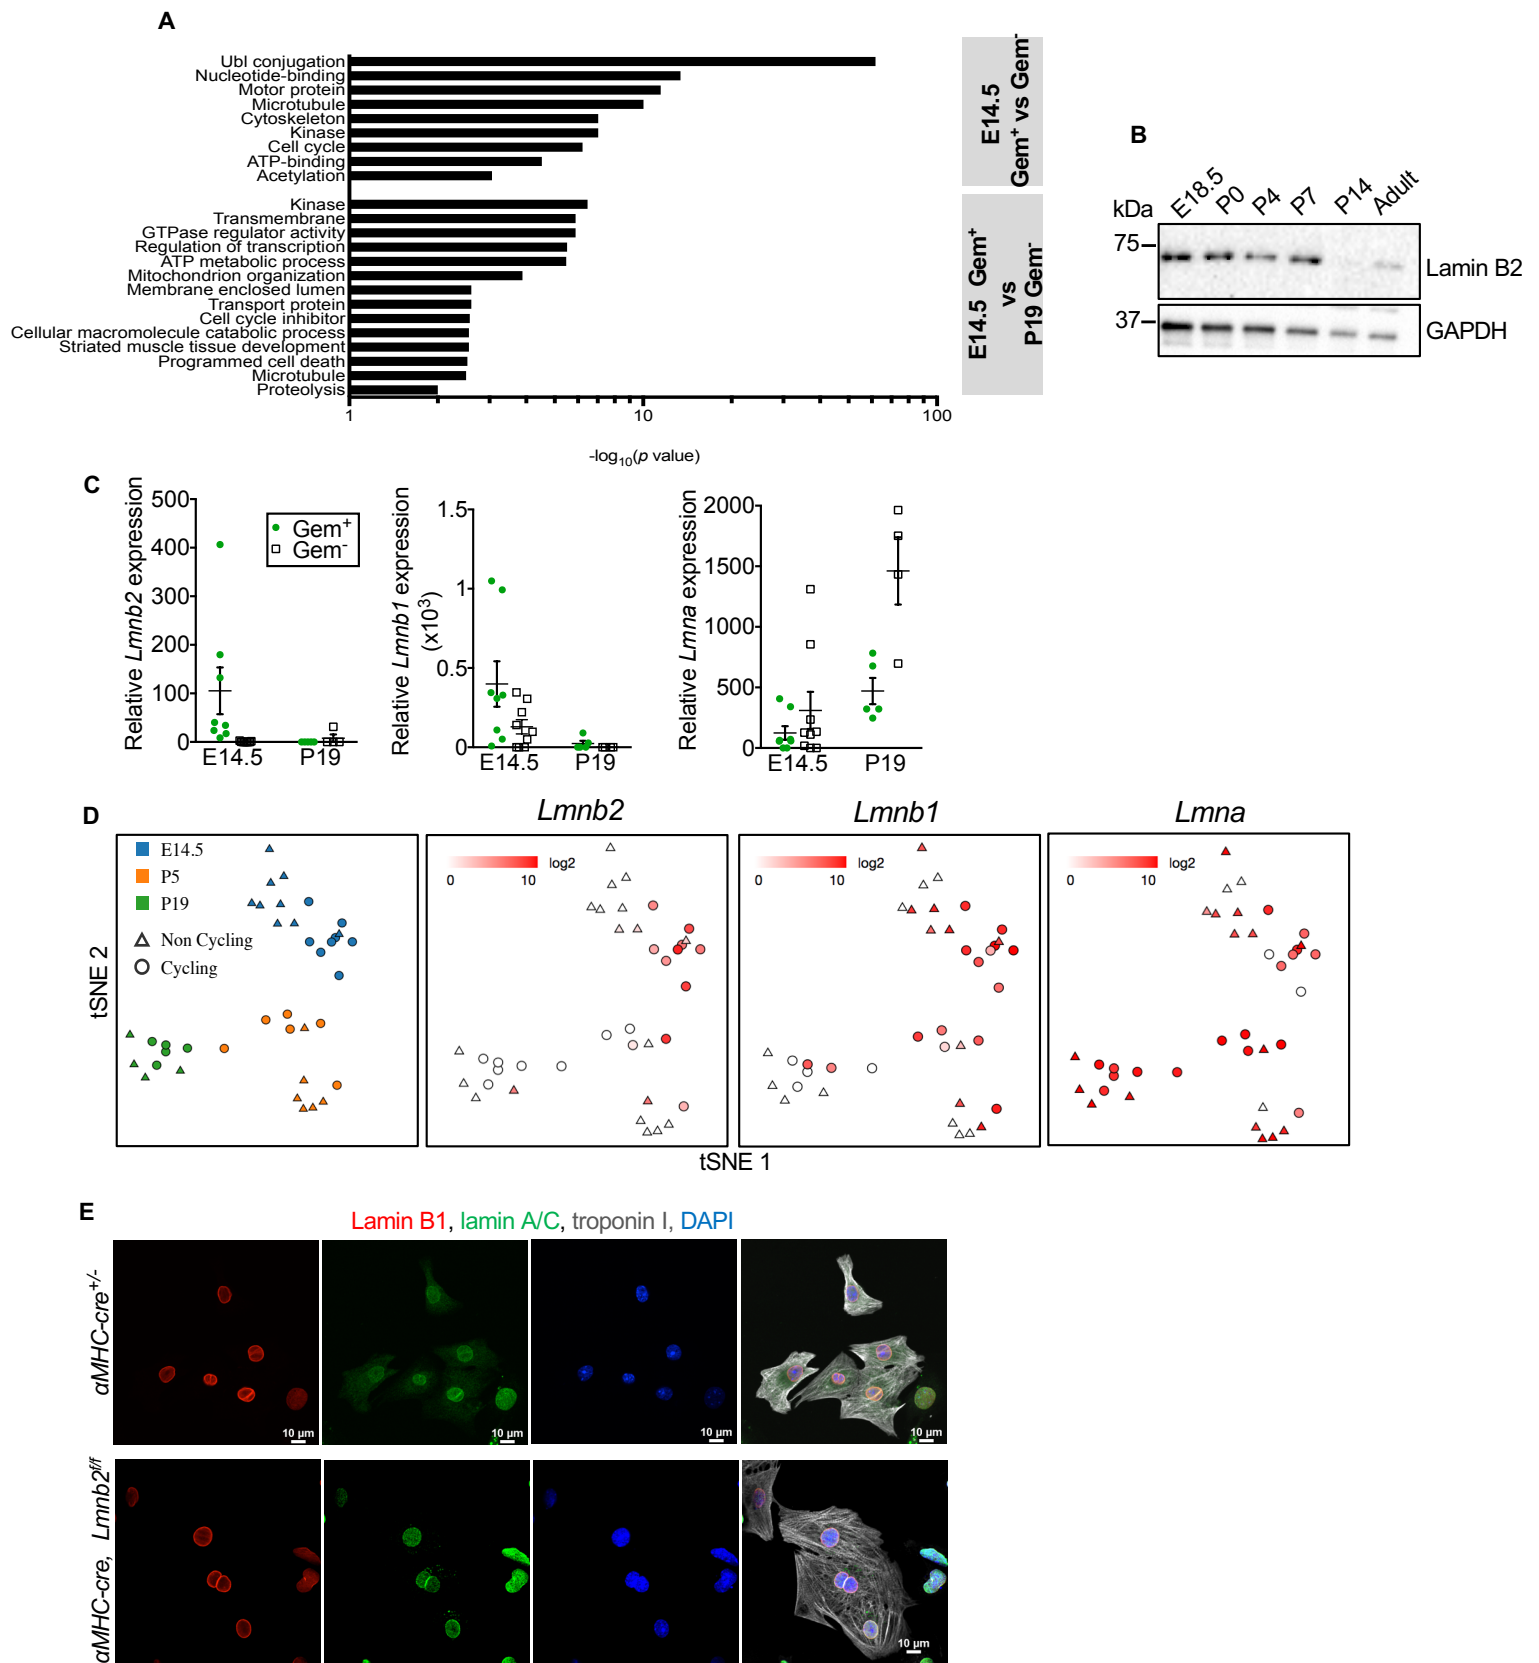

**Supplementary Figure S2. Genome-wide transcriptional profiling reveals unique expression profile of *Lmnb2*, and *Lmnb2* gene inactivation does not alter the nuclear lamina filament Lamin B1 and Lamin A/C in cardiomyocytes. (a-d) Related to Figure 1 and 2. (A) Gene ontology (GO) analysis of differentially expressed genes between embryonic geminin positive and negative group, and between embryonic geminin positive and adult negative group shows regulation of different cellular processes. (B) Western blot of lysate (15  $\mu$ g) from isolated cardiomyocytes shows decrease of Lamin B2 protein after birth. GAPDH was used as a loading control. (C-D) Dot plot (C) and tSNE profile (D) show high expression of *Lmnb2* in cycling embryonic cardiomyocytes, whereas *Lmnb1* and *Lmna* expression was not confined to dividing cardiomyocytes and *Lmna* was also expressed in adult cardiomyocytes. Left panel corresponds to Figure 1B and serves as reference to indicate cardiomyocytes at different developmental ages. The intensity of red color indicates expression level according to the provided scales. (E) Immunofluorescence microscopy of P2 cardiomyocytes showed that  $\alpha$ MHC-cre-induced *Lmnb2* KO does not affect Lamin B1 and Lamin A/C localization. Scale bars: 10  $\mu$ m. Error bars represent mean  $\pm$  SEM.**

H3P, Troponin I, DAPI

A

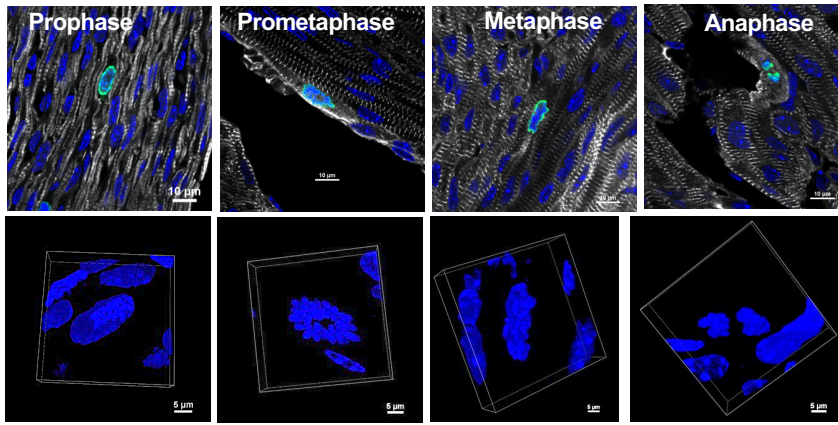

B *aMHC-Cre<sup>+/-</sup>*

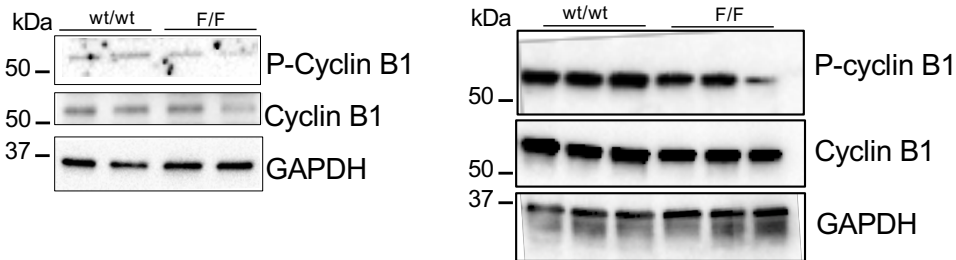

C

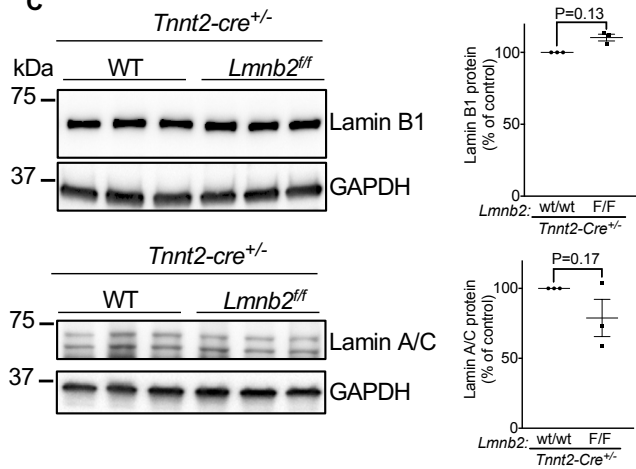

**Supplementary Figure S3. Related to Figure 2 and 5. *Lmn2* gene inactivation inhibits prometaphase-to-metaphase transition.** (A) Example photomicrographs (top) and three-dimensional nuclear volume view (bottom) of mitotic sub-phases *in-vivo* in P2 *Lmn2* KO heart sections. Scale bar, 10  $\mu$ m (top) 5  $\mu$ m (bottom). (B) Additional Western blot results of cyclin B1 and cyclin B1 phosphorylation in *Lmn2* KO cardiomyocytes. (C) Western blot shows that *Tnnt2-Cre*-induced *Lmn2* KO does not alter the protein amount of Lamin B1 and Lamin A/C at P0. Fifteen  $\mu$ g lysate loaded per lane and normalized against GAPDH. One heart per lane. Statistical significance was tested with two-tailed Student's *t*-test (C). Lamin B1: P=0.13; Lamin A/C; P=0.17.

A TNT-Cre WT

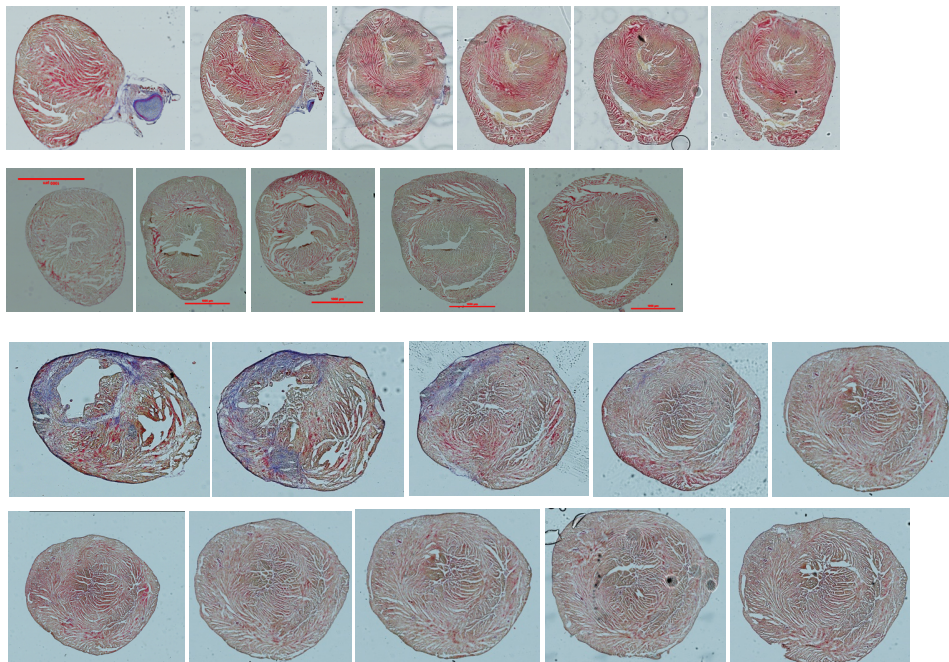

B TNT-Cre Lmnb2 KO hearts

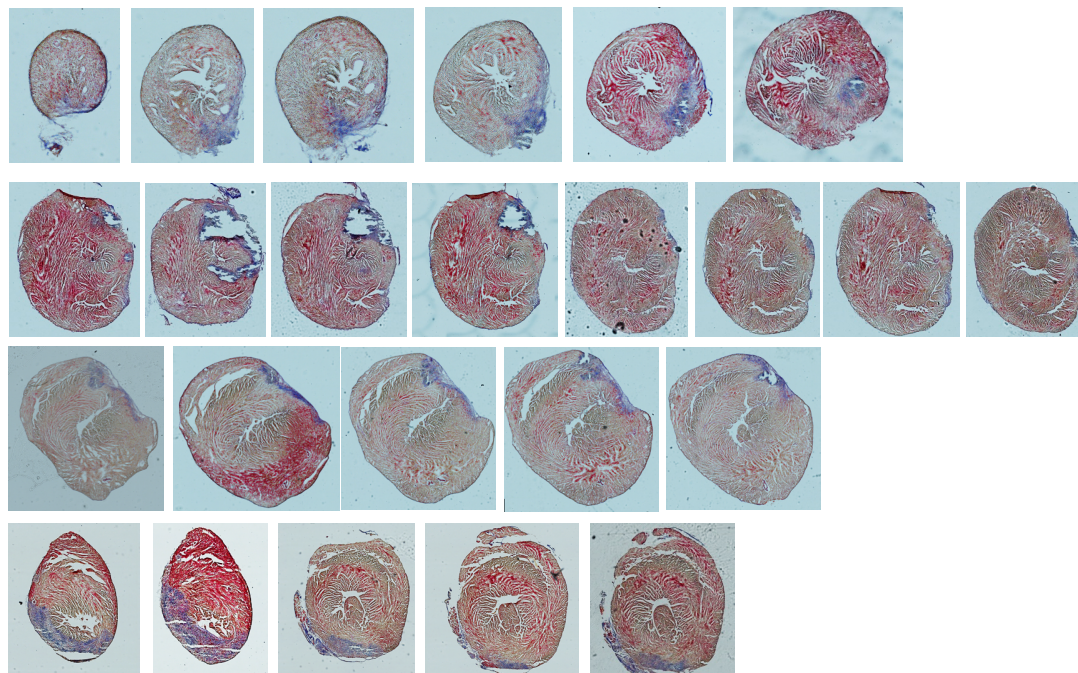

**Supplementary Figure. S4.** Relate to Figure 6. (A-B) Example of Scar formation visualized by AFOG staining of *Tnnt2-cre* (A) and *Tnnt2-cre, Lmnb2<sup>fl/fl</sup>* mice (B) 9 dpi post cryoinjury. Four out of nine hearts from each group were shown. Scale bar 1 mm.

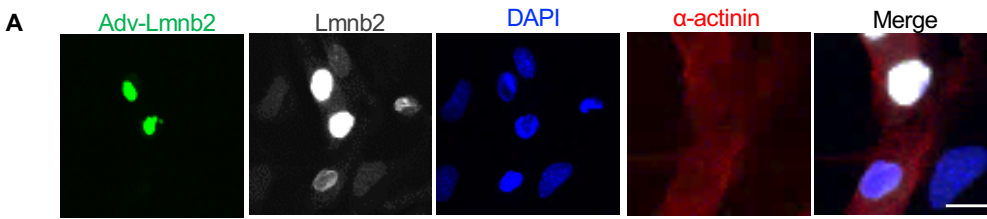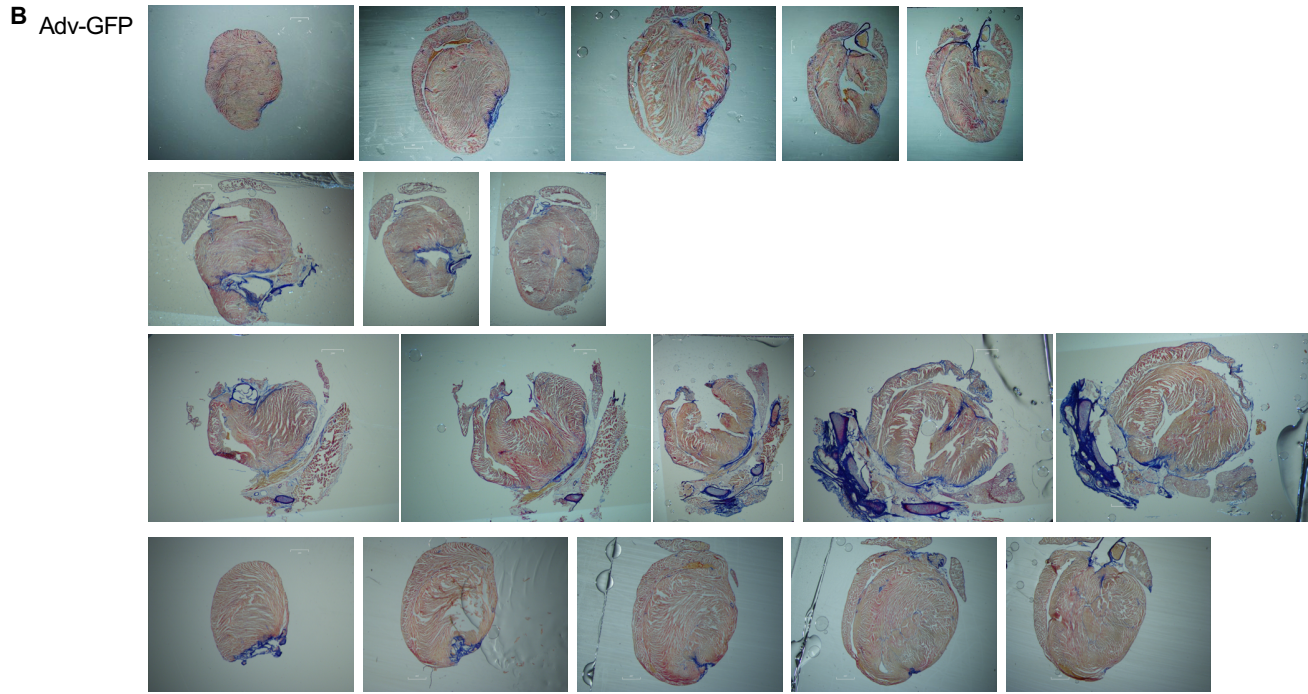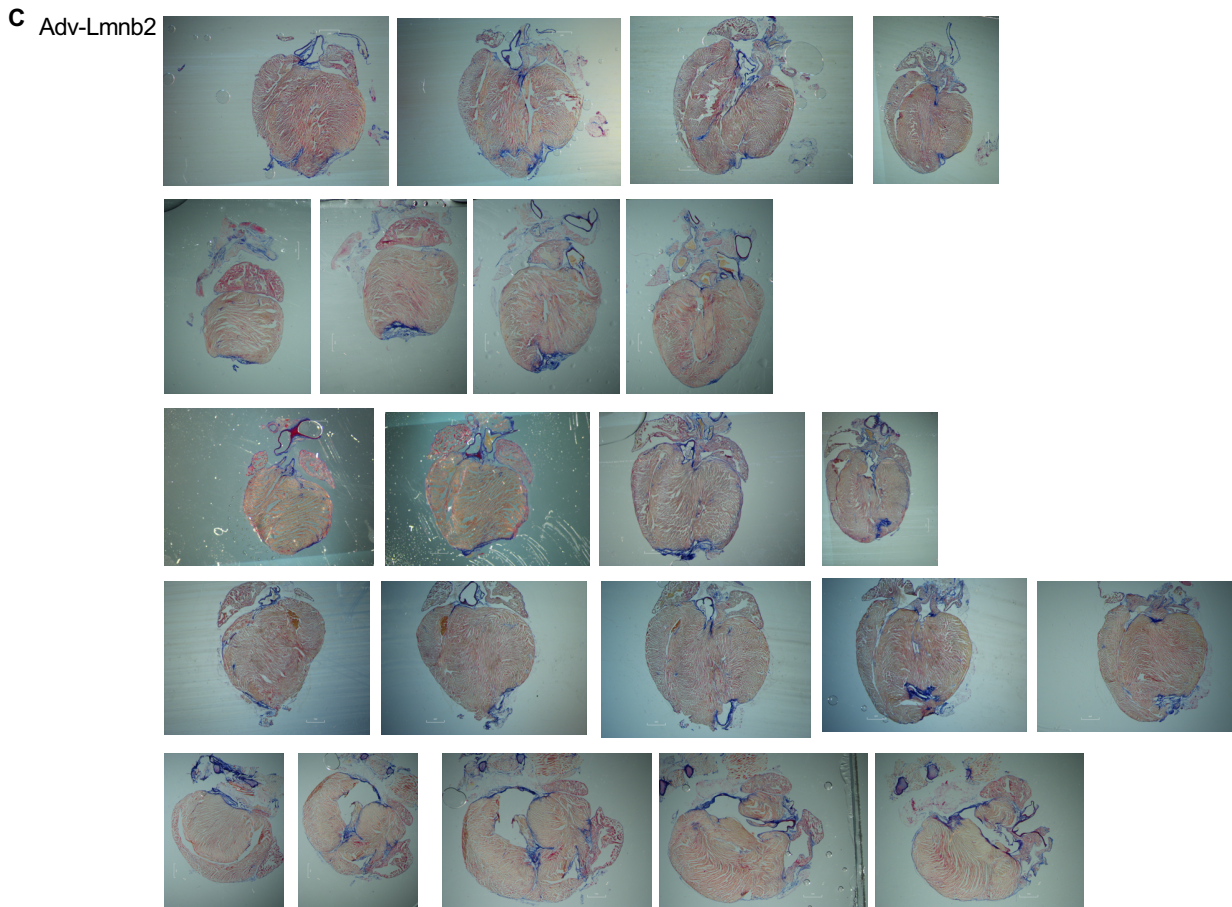

**Supplementary Figure S5. Related to Figure 7. Validation of nuclear expression of Adv-Lmnb2 and examples of scar analysis by AFOG staining. (A)** Adenoviral transduction with type V replication-deficient adenovirus increases lamin B2 protein expression in the nucleus. Mice received retro-orbital injection of Ad-GFP (control) or Ad-Lmnb2 (test) on the day of birth and cardiomyocytes were isolated and subjected to immunofluorescence microscopy. Scale bar 20  $\mu$ m. **(B, C)** Examples of scar formation visualized by AFOG staining of control and Lmnb2 adenoviral-transduced groups. Scale bar 1 mm. Note one heart from Ad-GFP group had adherent to the chest post injury, thus both scar and chest tissue are stained by AFOG.

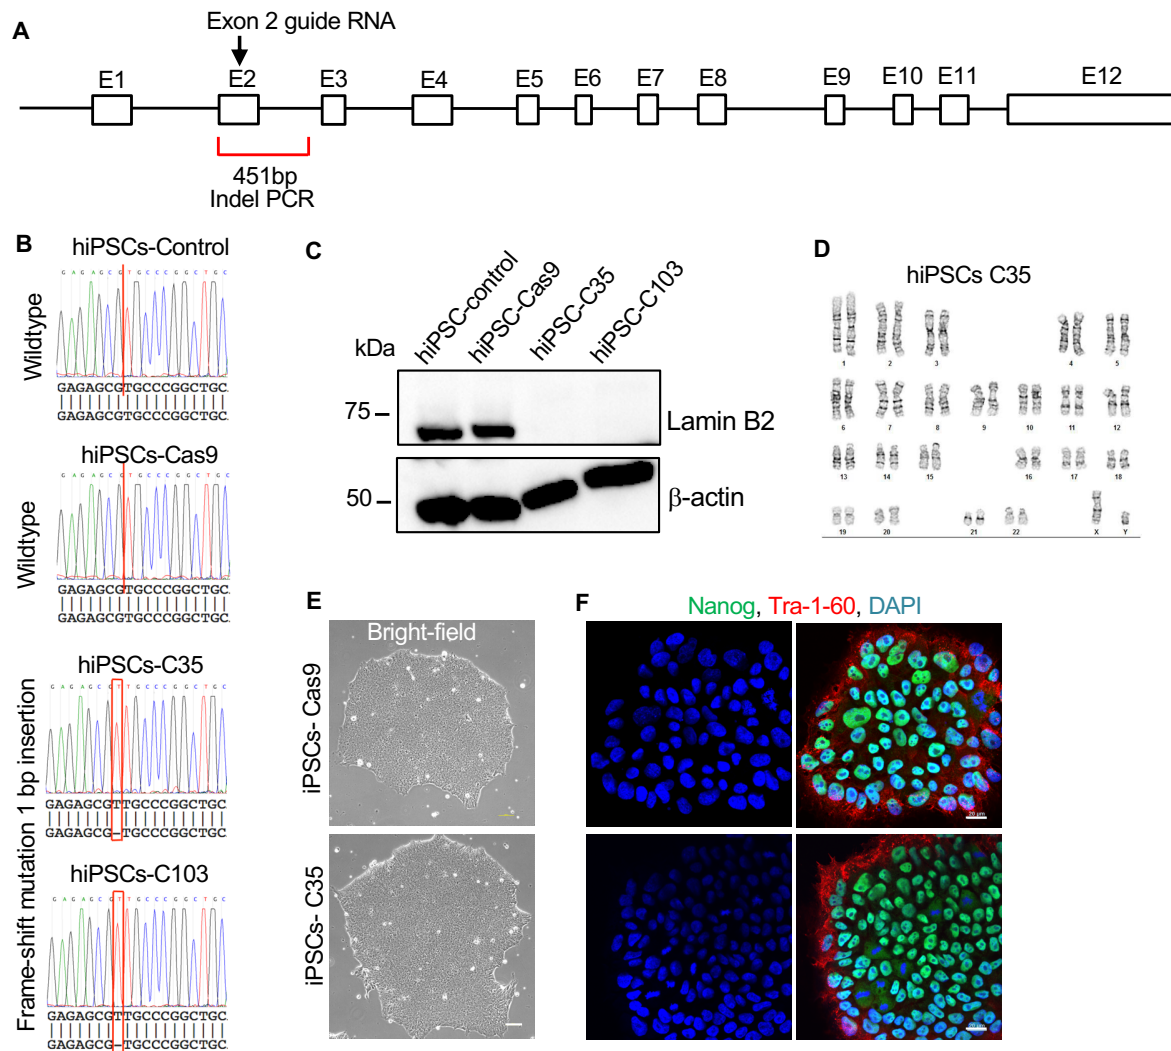

**Supplementary Figure S6. *LMNB2* gene is successfully inactivated with CRISPR/Cas9 in human iPSCs (hiPSCs).** Related to Fig. 8 A-D. (A) Strategy for creating indel in human *LMNB2* gene. CRISPR-Cas9 mediated deletion using guide RNA targeting *LMNB2* exon 2. SURVEYOR PCR primers amplify 451 bp of exon 2 including indel region. (B) Sanger sequencing of PCR products from controls and *LMNB2* guide RNA transduced clones. hiPSCs-Control: hiPS cell line (CiPS0001-013) with no transduction; Cas9-control: hiPS cells transduced with no specific guide RNA; C35 and C103: *LMNB2*<sup>-/-</sup> clones. Sequencing revealed a 1 bp insertion causing frame-shift mutation in clones C35 and C103. (C) Western blot of cell extracts labeled with Lamin B2 antibody shows no protein expression in *LMNB2*<sup>-/-</sup> hiPS clone C35. (D) *LMNB2*<sup>-/-</sup> hiPS clone C35 has normal karyotype and was used for further experimentation. (E-F) Each clone maintained normal morphology (bright-field) (E) and expressed pluripotency markers NANOG (green) and TRA-1-60 (red) determined by immunofluorescence microscopy (F). Scale bars 100 μm (E), 20 μm (F).

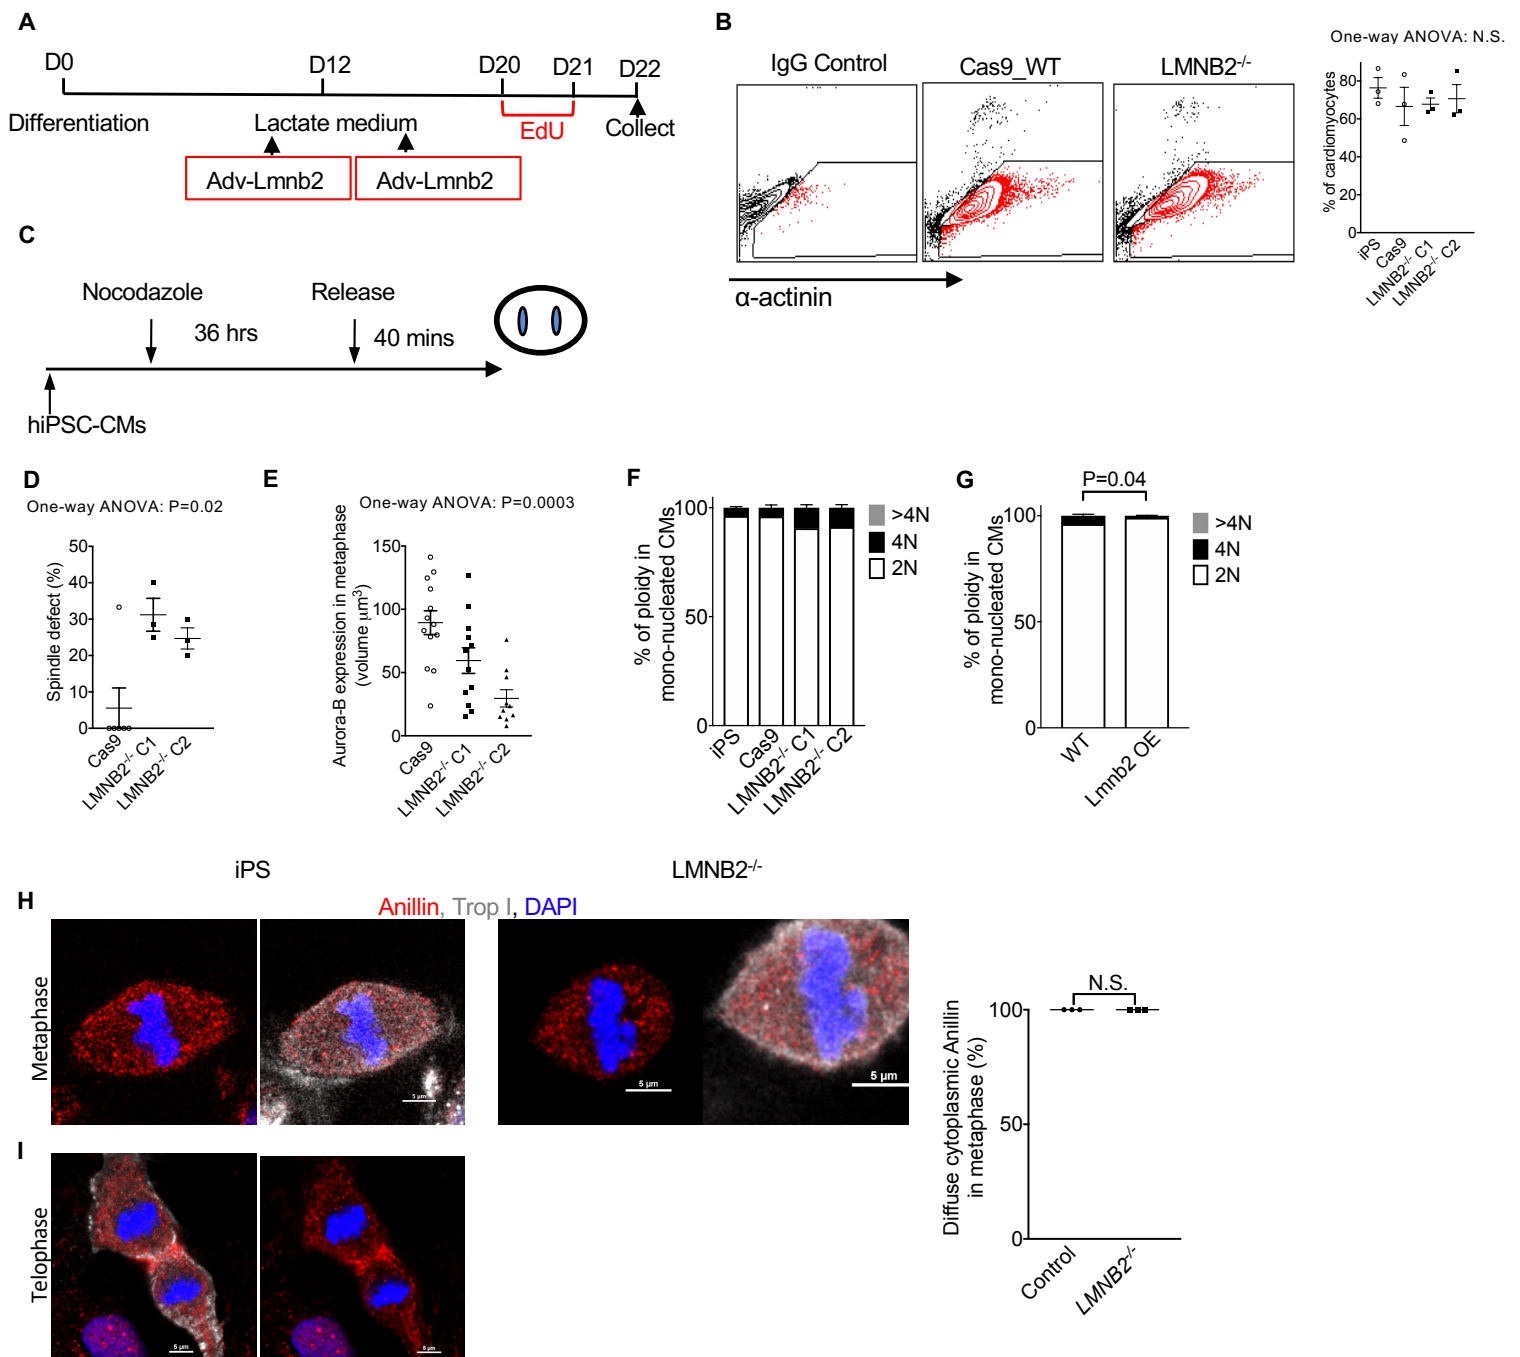

**Supplementary Figure S7. *LMNB2* gene inactivation with CRISPR/Cas9 in human iPSCs (hiPSCs) does not affect differentiation to cardiomyocytes and does not alter Anillin localization in metaphase of hiPSC-CMs.** Related to Fig. 8 A-D. (A) Experimental design for cardiomyocyte differentiation, and important time points for treatments corresponding to the experiments in Figure 8. (B) Two clones are analyzed and show consistent differentiation efficiency. The CMs were collected and stained with cardiac marker  $\alpha$ -actinin at day 12 before Lactate treatment. N.S. not significant. (C) Experimental design to enrich prometaphase and metaphase cardiomyocytes *in vitro*. (D) *LMNB2* KO hiPSC-CMs have disorganized spindles. Cas9 control: 25 cells; *LMNB2* KO: clone 1: 20 cells; clone 2: 24 cells; 3 biological replicates.  $P=0.02$  (E) Expression of Aurora B kinase, a chromosomal passenger protein, is decreased on centromeres in *LMNB2* KO hiPSC-CMs indicating decreased microtubule attachment in metaphase.  $n=13$  cells from Cas 9,  $n=12$  cells from clone 1, and  $n=10$  from clone 2, 3 biological replicates.  $P=0.0003$  (F) *LMNB2* gene inactivation increases nuclear ploidy in hiPSC-CMs in both clones. (G) Overexpression of *Lmnb2* decreases nuclear ploidy in hiPSC-CMs.  $P=0.04$  (H-I) Anillin is present in the cytoplasm of control and *LMNB2*<sup>-/-</sup> cardiomyocytes in metaphase (H). Anillin marks the contractile ring in telophase of wildtype hiPSC-CMs, which validates the specificity of Anillin antibody for contractile ring (I). iPSC and Cas9 WT:  $n=14$  cardiomyocytes in metaphase; *LMNB2*<sup>-/-</sup>:  $n=10$  cardiomyocytes in metaphase. N.S. not significant. Statistical significance was tested with One-way ANOVA (B, C, D, E, F) and Student's *t*-test (G, H). Error bars represent mean  $\pm$  SEM. Scale bar, 5  $\mu$ m.

## Supplementary Tables

**Supplementary Table S1.** *Related to Figure 1. List of differentially expressed genes between E14.5 cycling and non-cycling cardiomyocytes.* 163 genes were differentially expressed between E14.5 cycling and non-cycling cardiomyocytes. These genes have a p-value of  $\leq 0.05$  and false discovery rate (FDR) of  $\leq 10\%$ . (See **Supplementary Table 1\_163** differentially expressed genes.xlsx).



**Supplementary Table 1. List of differentially expressed genes between E14.5 cycling and non-cycling cardiomyocytes.** 163 genes were differentially expressed between E14.5 cycling and non-cycling cardiomyocytes. These genes have a p-value of  $\leq 0.05$  and false discovery rate (FDR) of  $\leq 10\%$ .

|            | g1         | g2         | g5         | g6         | g8         | g25        | g27        | g28        | g29        | n3         | n5         | n7         | n8          | n10         | n21         | n23        | n24        | n25        | n28        | n30         | Pvalue      | q          |            |
|------------|------------|------------|------------|------------|------------|------------|------------|------------|------------|------------|------------|------------|-------------|-------------|-------------|------------|------------|------------|------------|-------------|-------------|------------|------------|
| Fam64a     | 74.7803772 | 189.443014 | 1269.18413 | 163.393132 | 1224.39001 | 498.59193  | 729.333942 | 895.604214 | 842.366801 | 578.853982 | 0          | 0          | 0           | 0.104693264 | 0           | 0          | 0          | 25.5932047 | 0          | 0.47824666  | 3.081E-11   | 2.9132E-07 |            |
| Aspm       | 709.983811 | 723.43551  | 3572.74128 | 738.536958 | 3496.48405 | 1222.79107 | 5777.80339 | 260.020794 | 207.297439 | 1698.11676 | 0          | 0          | 0           | 0           | 0           | 0          | 0          | 44.0990604 | 0          | 0.95649331  | 3.9522E-11  | 2.9132E-07 |            |
| Penpe      | 2226.22042 | 306.660879 | 1296.8778  | 1681.85998 | 4088.60111 | 165.821298 | 5294.42417 | 2768.45669 | 4240.11645 | 1022.90024 | 0          | 0          | 0           | 2.61733159  | 0           | 0          | 0          | 2.36244967 | 0          | 0.95649331  | 5.7326E-10  | 2.817E-06  |            |
| Cdc2a      | 1190.46922 | 287.716578 | 411.822554 | 374.714917 | 820.640651 | 1058.09781 | 5272.62472 | 1327.38755 | 2326.55218 | 1528.53591 | 0          | 0          | 0           | 0           | 0           | 0          | 0          | 163.79651  | 0          | 0           | 2.0672E-09  | 5.0126E-06 |            |
| Nusap1     | 2954.25467 | 201.283203 | 3449.91701 | 893.21579  | 8778.81066 | 1178.79766 | 14914.1446 | 4526.80081 | 4167.80339 | 8584.8833  | 0          | 0          | 2.53051607  | 80.5773655  | 3.14079791  | 0          | 0          | 59.0612416 | 0          | 0.286947994 | 2.3802E-09  | 5.0126E-06 |            |
| Ccnb1      | 997.93124  | 151.554411 | 5517.4589  | 610.001027 | 2038.45969 | 721.943066 | 18323.8637 | 11476.2596 | 3636.86483 | 14646.1663 | 0          | 0          | 0           | 0           | 0           | 0          | 14.5496074 | 0          | 0.95649331 | 2.2533E-09  | 5.0126E-06  |            |            |
| Slc6a6     | 1509.36026 | 1258.61203 | 964.531772 | 1977.0569  | 129.228999 | 1166.38927 | 351.634688 | 39.6852087 | 3011.7586  | 1394.54484 | 0          | 0          | 0           | 0           | 19.8966229  | 0          | 0          | 0.78748322 | 0          | 0           | 1.9247E-09  | 5.0126E-06 |            |
| Sgol1      | 670.444761 | 140.898242 | 34.9206259 | 1236.34137 | 1103.9223  | 887.764364 | 1665.76271 | 2260.81673 | 93.2034996 | 476.21258  | 0          | 0          | 0           | 0           | 0           | 0          | 0          | 21.6557886 | 0          | 0           | 1.9247E-09  | 5.0126E-06 |            |
| Fam83d     | 1783.55497 | 574.249137 | 15096.5478 | 781.019172 | 6538.84134 | 758.040219 | 9473.28492 | 3407.14052 | 3322.54406 | 7032.56811 | 0          | 0          | 0           | 27.4559912  | 3.14079791  | 0          | 0          | 251.246879 | 0          | 0.286947994 | 7.4429E-09  | 1.0972E-05 |            |
| Racgap1    | 989.335795 | 207.203297 | 1267.97997 | 621.98319  | 1412.7577  | 180.485766 | 1414.12117 | 1216.39298 | 1949.88149 | 1043.82316 | 0          | 0          | 1.26252804  | 6.56556311  | 1.04693264  | 0          | 4.85904315 | 14.5684396 | 0          | 85.3168567  | 3.3477266   | 7.204E-09  | 1.0972E-05 |
| Hmnr       | 2266.61902 | 184.706939 | 10234.1517 | 250.536136 | 5535.67385 | 3640.1723  | 6429.41754 | 2402.81537 | 3428.60322 | 4195.96599 | 0          | 0          | 0           | 0           | 0           | 0          | 0          | 0          | 0          | 0.95649331  | 9.9338E-09  | 1.3313E-05 |            |
| Ckap2l     | 5342.06947 | 1915.74248 | 12353.4725 | 2733.02246 | 2954.74441 | 7685.30954 | 13052.6607 | 5990.39957 | 5850.60864 | 4662.74861 | 0          | 0          | 0           | 0           | 0           | 0          | 0          | 506.745453 | 0          | 0           | 2.39123328  | 1.1869E-08 | 1.4581E-05 |
| Prc1       | 1303.92911 | 329.157237 | 2516.69339 | 291.929063 | 2502.07786 | 1223.9191  | 7549.71997 | 5172.92561 | 3236.73257 | 6621.63981 | 0          | 0          | 0           | 0           | 0           | 0          | 0          | 20.0808222 | 0          | 1.11162028  | 25.8253195  | 1.5183E-08 | 1.7218E-05 |
| Anln       | 4309.75645 | 5255.85963 | 31770.5446 | 10588.9643 | 11156.0402 | 24925.0843 | 18930.9311 | 4815.55204 | 4789.37431 | 7054.32954 | 0          | 0          | 0           | 0.59686937  | 5.23466318  | 0          | 0          | 1.11162028 | 0          | 0           | 2.7653E-08  | 2.9118E-05 |            |
| Kif20b     | 2505.57241 | 290.084615 | 1994.08816 | 502.16156  | 7574.13355 | 3853.37111 | 4818.15347 | 916.686982 | 5455.61864 | 8424.21142 | 0          | 0          | 0           | 323.503201  | 6.28159581  | 0          | 0          | 10.2372819 | 26.2602671 | 0           | 0.95649331  | 3.9703E-08 | 3.9021E-05 |
| Aurkb      | 445.244083 | 693.835039 | 14.4499142 | 223.303947 | 1517.16305 | 661.02912  | 704.69108  | 845.584316 | 802.51427  | 531.341531 | 0          | 0          | 0           | 0           | 0           | 0          | 0          | 213.801695 | 0          | 0           | 4.2572E-08  | 3.9225E-05 |            |
| Kif23      | 1354.64223 | 242.723862 | 72.661216  | 623.072478 | 2691.17566 | 2579.81842 | 6513.77195 | 2805.54039 | 2129.86066 | 4581.86864 | 0          | 0          | 0           | 0           | 0           | 0          | 0          | 891.824749 | 0          | 0           | 5.197E-08   | 4.5067E-05 |            |
| Dlga5      | 1049.50391 | 47.3607535 | 3178.98112 | 520.679448 | 1436.12114 | 495.207822 | 4119.6231  | 4333.7488  | 717.024164 | 3635.24653 | 0          | 0          | 0           | 0           | 0           | 0          | 0          | 531.157433 | 0          | 0           | 1.91298663  | 6.3367E-07 | 5.1898E-05 |
| C330027C09 | 850.089575 | 607.401664 | 7450.13492 | 2327.80749 | 5632.77813 | 3784.56092 | 12576.8639 | 1787.90133 | 1349.84379 | 4059.95706 | 0          | 1042.48275 | 0           | 3.58121624  | 1.04693264  | 0          | 0          | 20.0808222 | 0          | 1.38952535  | 0.1672E-07  | 0.00012973 |            |
| Penf       | 3642.74987 | 187.074977 | 13476.9533 | 3283.11267 | 6465.1005  | 4620.43562 | 13378.7047 | 4965.61174 | 7662.61323 | 11528.8418 | 0          | 0          | 0.506103215 | 0           | 0.209386527 | 0          | 0          | 100.010369 | 0          | 0           | 993.796553  | 1.8192E-07 | 0.00013409 |
| Nek2       | 650.675236 | 188.258995 | 4932.23737 | 466.215071 | 2203.46395 | 793.009336 | 1301.33269 | 1305.6847  | 898.610292 | 2640.38658 | 0          | 0          | 0           | 0           | 0           | 0          | 0          | 871.350185 | 0          | 0.55581014  | 0.19145E-07 | 0.00013409 |            |
| Mki67      | 6645.13903 | 1334.38923 | 36105.5189 | 5074.99069 | 3894.39255 | 8261.73596 | 8979.95378 | 3293.87232 | 17786.4416 | 10192.3274 | 0          | 0          | 0           | 0           | 0           | 0          | 0          | 4400.84999 | 0          | 0.55581014  | 0.47824666  | 2.2758E-07 | 0.0001525  |
| Shcp1      | 2532.21829 | 1605.52955 | 9951.17423 | 6238.34979 | 10243.406  | 3768.76841 | 10252.3785 | 1412.54524 | 2525.81484 | 2156.5575  | 2.32935081 | 0          | 0           | 0           | 4.18773054  | 0          | 0          | 2095.8866  | 0          | 0           | 1.91298663  | 7.2749E-07 | 0.00016887 |
| Kif4       | 685.916563 | 78.152434  | 77.066209  | 359.464891 | 2004.87476 | 894.53258  | 2180.41941 | 642.817703 | 16.3909603 | 1197.9666  | 0          | 0          | 0           | 0           | 0           | 0          | 0          | 217.739111 | 0          | 0           | 2.6513E-07  | 0.00016887 |            |
| Mxd3       | 30.9436043 | 21.3123391 | 80.678675  | 32.6786265 | 73.7408414 | 42.8653695 | 279.127805 | 230.256888 | 278.646325 | 23.2121897 | 0          | 0          | 0           | 0           | 0           | 0          | 0          | 0          | 0          | 0           | 3.0713E-07  | 0.00017415 |            |
| Ndc80      | 3547.34042 | 597.929514 | 668.308531 | 140.518094 | 5446.60076 | 2236.89547 | 3161.39488 | 3902.79224 | 7233.87713 | 2711.11122 | 0          | 0          | 0           | 0           | 0           | 0          | 0          | 1865.94149 | 0          | 1.11162028  | 3.309E-07   | 0.00017415 |            |
| Ttk        | 182.223448 | 333.893313 | 2187.95784 | 786.46561  | 1845.71136 | 489.567641 | 778.145765 | 240.798271 | 2278.02209 | 394.607226 | 0          | 0          | 0           | 0           | 0           | 0          | 0          | 725.665789 | 0          | 0           | 3.593E-07   | 0.00019618 |            |
| Kif2c      | 305.997865 | 40.2566405 | 1411.27495 | 17.4286008 | 1035.29221 | 720.81503  | 920.790025 | 2201.49561 | 776.80296  | 276.370134 | 0          | 0          | 0           | 0           | 0           | 0          | 0          | 0          | 0          | 0.95649331  | 5.9262E-07  | 0.00031202 |            |
| Ncapg      | 710.843355 | 104.193658 | 564.750813 | 364.911329 | 522.756856 | 462.494777 | 603.750125 | 314.79465  | 449.947929 | 47.8751431 | 0          | 0          | 0           | 0           | 0           | 0          | 0          | 368.935889 | 0          | 0           | 9.4544E-07  | 0.00048061 |            |
| Ccna2      | 3071.15273 | 863.149733 | 6226.95819 | 11188.895  | 1714.61478 | 5969.25947 | 3493.95191 | 3641.38286 | 2637.12237 | 0          | 0          | 0          | 0           | 0           | 0           | 0          | 0          | 1466.29376 | 0          | 0.47824666  | 1.0096E-06  | 0.00049609 |            |
| Gtse1      | 120.336239 | 22.4963579 | 827.257857 | 150.321682 | 407.399896 | 316.977127 | 745.446583 | 146.959288 | 352.24495  | 128.029734 | 0          | 0          | 0           | 0           | 0           | 0          | 0          | 361.061057 | 1.4194739  | 0           | 1.1532E-06  | 0.00054862 |            |
| C79407     | 1950.30662 | 7.10411303 | 12437.7636 | 416.107844 | 11177.2133 | 318.106163 | 3200.72868 | 1837.50784 | 4458.34119 | 5852.37334 | 0          | 0          | 0           | 0           | 0           | 0          | 0          | 11.8122483 | 0          | 0.47824666  | 1.2082E-06  | 0.00054862 |            |
| 4930547N16 | 22.3481587 | 24.8643956 | 7203.28222 | 214.589647 | 216.84188  | 188.382019 | 619.388664 | 744.725453 | 132.091856 | 569.78672  | 0          | 0          | 0           | 1.19373875  | 4.18773054  | 1.42118735 | 0          | 0          | 0          | 0           | 1.3697E-06  | 0.00061128 |            |
| Bub1       | 1412.23172 | 303.108823 | 1345.04618 | 2710.14742 | 1877.10597 | 1031.02494 | 4930.94195 | 1261.86562 | 1912.92148 | 1374.23417 | 0          | 0          | 0           | 0           | 0           | 0          | 0          | 975.29797  | 0          | 0           | 1.4405E-06  | 0.00062446 |            |
| Arhgap11a  | 771.87102  | 253.380031 | 14655.5135 | 1760.28868 | 5722.58133 | 2311.34585 | 1403.22144 | 913.379881 | 1169.54322 | 1096.05058 | 0          | 0          | 0           | 0           | 0           | 0          | 0          | 1409.20123 | 0.70973695 | 0           | 1.4924E-06  | 0.00062862 |            |
| Neur1b     | 239.812934 | 67.4890738 | 416.63192  | 21.785751  | 156.782756 | 399.324758 | 167.634548 | 90.6323685 | 541.134173 | 0          | 0          | 0          | 2.3874775   | 0           | 0           | 0          | 0          | 376.023238 | 0          | 0           | 1.5579E-06  | 0.00063795 |            |
| Arhgap19   | 80.7791891 | 69.8571115 | 160.153215 | 2.1785751  | 676.079397 | 99.2671715 | 51.1813293 | 148.406145 | 99.3177609 | 98.6518064 | 0          | 0          | 0           | 14.324865   | 18.4754356  | 0          | 0          | 0          | 0          | 0           | 1.6389E-06  | 0.00065299 |            |
| Nuf2       | 307.716954 | 183.52292  | 1213.79279 | 1017.39457 | 1266.73624 | 268.472578 | 1396.11293 | 4333.54211 | 1872.42617 | 1821.06882 | 0          | 0          | 0           | 0           | 0           | 0          | 0          | 2449.46656 | 0.70973695 | 0           | 1.952E-06   | 0.00073786 |            |
| Kif18a     | 2117.05826 | 189.443014 | 3286.15132 | 4.35715019 | 11226.1305 | 464.750849 | 2274.25184 | 6388.90521 | 4486.94503 | 2095.6255  | 0          | 0          | 0           | 0           | 0           | 0          | 0          | 14.9621812 | 0          | 0           | 333.33792   | 1.9054E-06 | 0.00073786 |
| Incepp     | 1944.28981 | 679.626813 | 930.815305 | 240.732548 | 778.294425 | 874.227931 | 1521.69674 | 419.38171  | 3794.34661 | 2144.58872 | 0          | 0          | 0           | 0           | 0           | 0          | 0          | 2255.35195 | 2.83894779 | 1.11162028  | 2.266E-06   | 0.00083515 |            |
| Cntrob     | 229.498399 | 372.965934 | 964.531772 | 160.12527  | 202.969841 | 684.717876 | 151.174482 | 467.954752 | 361.243909 | 924.860685 | 0          | 1.62127956 | 0           | 2.3874775   | 0           | 0          | 0          | 1.57496644 | 0          | 0           | 7.4557E-06  | 0.00101875 |            |
| Aurka      | 165.032557 | 59.2009419 | 434.701585 | 3.26786265 | 844.004086 | 241.399713 | 1532.12257 | 597.138374 | 312.071028 | 1167.50061 | 0          | 0          | 0           | 0           | 0.52346632  | 0          | 0          | 0          | 0          | 0           | 3.2291E-06  | 0.0010819  |            |
| Spc25      | 6345.15798 | 2616.68163 | 7112.97026 | 6128.33175 | 14775.1822 | 4328.27429 | 20493.8573 | 41731.0639 | 28192.1303 | 11296.7199 | 0          | 0          | 0           | 410.646129  | 3.14079791  | 0          | 0          | 6002.59086 | 1.4194739  | 0           | 0.47824666  | 3.0933E-06 | 0.0010819  |
| Sgol2      | 1273.84505 | 439.270989 | 4859.9878  | 2421.48622 | 6261.40055 | 2171.46938 | 7307.55645 | 2205.42279 | 515.833161 | 2481.16547 | 27.9522098 | 6.48511822 | 0           | 0           | 0           | 0          | 0          | 3.1407     |            |             |             |            |            |



|             |            |            |            |            |            |            |            |            |            |            |            |            |            |            |            |            |            |            |            |            |            |            |            |
|-------------|------------|------------|------------|------------|------------|------------|------------|------------|------------|------------|------------|------------|------------|------------|------------|------------|------------|------------|------------|------------|------------|------------|------------|
| Poc1a       | 101.426259 | 134.978148 | 169.786492 | 87.1430039 | 61.3290166 | 121.827892 | 2.36950598 | 406.566695 | 15.4267861 | 311.188419 | 0          | 0          | 0          | 5.96869374 | 0          | 29.1343407 | 41.3018668 | 14.9621812 | 0          | 0          | 76.9977118 | 0.00057101 | 0.05995681 |
| Neil3       | 3340.19018 | 176.418807 | 0          | 5877.79561 | 806.038504 | 1758.60819 | 6.63461676 | 6040.41947 | 2145.60884 | 257.51023  | 0          | 0          | 0          | 0          | 0          | 0          | 875.437608 | 149.621812 | 0          | 0          | 0          | 0.00057346 | 0.05995681 |
| Kif1Bb      | 145.263032 | 0          | 439.518223 | 0          | 669.508431 | 90.2428832 | 67.2939699 | 374.942544 | 683.920852 | 883.876662 | 0          | 0          | 0          | 0          | 0          | 0          | 0          | 178.36495  | 0          | 0          | 0          | 0.00058232 | 0.06045512 |
| Ccdc99      | 283.649707 | 1031.28041 | 2.40831903 | 954.215893 | 1560.23939 | 1279.19287 | 937.850468 | 894.777439 | 866.149763 | 0.72538093 | 0          | 423.964604 | 0          | 0          | 0          | 0          | 0          | 452.015369 | 0          | 0          | 0          | 0.00059327 | 0.0611607  |
| Taf8        | 390.233233 | 1018.2562  | 2402.29823 | 52.2858023 | 150.402112 | 119.57182  | 111.840682 | 0          | 597.466571 | 0          | 0          | 59.9873435 | 0          | 0          | 0          | 0          | 0          | 0          | 0          | 0          | 0          | 0.00060451 | 0.06188662 |
| Wee1        | 1263.53051 | 533.992496 | 1127.09331 | 401.947105 | 1222.19969 | 329.386524 | 505.178676 | 816.440491 | 1725.55031 | 3129.65602 | 0          | 91.6022949 | 87.3028046 | 1283.86602 | 2.09386527 | 0          | 0          | 1459.60015 | 19.1628976 | 0          | 0          | 0.00062658 | 0.06370331 |
| Stk17b      | 1126.86292 | 1520.28019 | 16299.5032 | 1196.03773 | 9165.76755 | 3289.35309 | 7280.07019 | 5546.00791 | 878.362636 | 5510.71892 | 7477.21611 | 0          | 2.53051607 | 389.755701 | 2.09386527 | 0          | 0          | 2652.24349 | 0          | 1.11162028 | 682.457979 | 0.00063837 | 0.06445794 |
| Lrrc10      | 532.91763  | 670.154663 | 131.253387 | 640.501079 | 309.565512 | 271.856686 | 396.655302 | 974.147857 | 89.346803  | 101.19064  | 1409.25724 | 842.254729 | 2448.2743  | 1676.0092  | 1224.91118 | 2258.2667  | 275.075832 | 845.363239 | 744.15919  | 1547.09753 | 2386.92906 | 0.00071237 | 0.07095761 |
| Cks2        | 2708.42492 | 992.207787 | 8297.86322 | 2069.64634 | 10076.2114 | 1581.50653 | 10043.3881 | 10619.7205 | 7162.52825 | 6905.26376 | 0          | 693.90765  | 0          | 503.757752 | 39.2599738 | 1.42118735 | 858.700904 | 655.186041 | 483.68573  | 107.549262 | 1064.09881 | 0.00070765 | 0.07095761 |
| Kifc1       | 292.245152 | 8.28813187 | 8.42911661 | 0          | 32.8548303 | 226.735244 | 126.057718 | 0.41338759 | 136.269944 | 343.46787  | 0          | 0          | 0          | 0          | 1.04693264 | 0          | 0          | 0          | 0          | 0          | 0          | 0.00075591 | 0.07432706 |
| Rfc4        | 116.898061 | 73.409168  | 122.824271 | 435.715019 | 68.63009   | 160.181118 | 253.063239 | 378.456339 | 243.936056 | 8.34188069 | 0          | 0          | 0          | 47.1526805 | 0          | 0          | 0          | 303.18104  | 289.217806 | 0.55581014 | 0          | 0.00075628 | 0.07432706 |
| Chek2       | 205.431151 | 14.2082261 | 0          | 150.321682 | 290.582721 | 0          | 52.1291316 | 95.6992272 | 42.7450533 | 831.286545 | 0          | 0          | 0          | 0          | 0          | 0          | 0          | 19.6870805 | 0          | 0          | 0.47824666 | 0.00078453 | 0.07659295 |
| Tmem194     | 126.353051 | 7.10411303 | 0          | 421.554281 | 186.907479 | 760.296291 | 821.744675 | 639.510602 | 561.792128 | 1184.90975 | 0          | 0          | 0          | 94.9022305 | 1.04693264 | 880.425564 | 0.53989368 | 0          | 0          | 0          | 0          | 0.0008405  | 0.08151748 |
| Lcorl       | 4853.84816 | 1564.08889 | 2924.90346 | 1826.73522 | 1355.07922 | 959.95867  | 1648.70226 | 1043.59697 | 4574.68487 | 672.065431 | 0          | 522.862657 | 0          | 2662.63428 | 5.23466318 | 2250.45017 | 0.53989368 | 45.6740269 | 3.54868474 | 1.11162028 | 124.344131 | 0.00085987 | 0.08197665 |
| Csrp3       | 6383.83749 | 10726.0267 | 6758.94736 | 4081.56045 | 6352.66397 | 5957.15833 | 8786.60209 | 5330.42628 | 6680.11979 | 8002.03972 | 7363.07792 | 11426.7783 | 19228.1264 | 13913.622  | 33278.8477 | 21771.8796 | 12892.3912 | 8929.666   | 8339.764   | 9102.50269 | 12091.5102 | 0.00086192 | 0.08197665 |
| Lnx1        | 4040.719   | 589.641382 | 13426.3786 | 3730.80985 | 3645.42595 | 5704.47826 | 12.7953323 | 1254.01126 | 1255.35472 | 0          | 0          | 0          | 235.763403 | 3.14079791 | 0          | 0          | 0          | 1.57496644 | 2.12921084 | 0          | 4649.514   | 0.0008551  | 0.08197665 |
| Igap3       | 572.45668  | 26.0484145 | 146.907461 | 297.375501 | 196.398875 | 54.1457299 | 297.609952 | 183.957478 | 82.9189755 | 668.438526 | 0          | 0          | 0          | 105.645879 | 0          | 0          | 0          | 142.534463 | 0          | 0          | 956.97156  | 0.00087943 | 0.08310635 |
| Cit         | 179.644814 | 2.36803768 | 0          | 216.768222 | 29.934401  | 4.51214416 | 4.73901197 | 68.2089524 | 7.71339307 | 374.65925  | 0          | 0          | 0          | 0          | 0          | 0          | 0          | 0          | 0          | 0          | 0          | 0.00091078 | 0.08517937 |
| Gm6682      | 24.9267924 | 9.47215071 | 172.194811 | 7.62501284 | 70.820412  | 42.8653695 | 196.668997 | 161.014466 | 117.307853 | 213.624684 | 4.65870163 | 38.9107093 | 0          | 2.3874775  | 92.6535382 | 4.97415573 | 22.6755347 | 1.18122483 | 10.2911857 | 0          | 0.95649331 | 0.00091293 | 0.08517937 |
| 4931417G12  | 117.757605 | 0          | 0          | 191.714609 | 253.347247 | 107.163424 | 1.89560479 | 1209.3654  | 779.374091 | 262.225206 | 0          | 0          | 0          | 0          | 0          | 0          | 0          | 0          | 0          | 0          | 0          | 0.00098371 | 0.09120651 |
| Tubb5       | 18285.9511 | 6922.95815 | 23605.139  | 15867.6517 | 15405.995  | 16819.0174 | 38907.7622 | 45434.6033 | 33794.3034 | 29022.491  | 2382.92588 | 1900.95028 | 6269.35358 | 7917.47225 | 6246.0001  | 2327.90488 | 11995.3579 | 22322.3932 | 10948.4022 | 8469.43493 | 14143.6666 | 0.00102803 | 0.09472006 |
| Nup155      | 804.533713 | 181.154882 | 774.274568 | 1470.53819 | 691.411651 | 300.057587 | 740.233669 | 3934.2097  | 1682.48386 | 624.19029  | 0          | 0          | 0          | 10.4693264 | 54.715713  | 957.771395 | 289.793826 | 114.977386 | 19.73126   | 0.95649331 | 0.0010364  | 0.0948983  |            |
| Tsr1        | 0          | 318.501068 | 0          | 0          | 0          | 0          | 0          | 0          | 0          | 0          | 0          | 0          | 0          | 2624.13665 | 5242.04954 | 1.07978737 | 1006.00982 | 1714.01473 | 7419.78748 | 202.298336 | 0.00109896 | 0.0993922  |            |
| 2810006K231 | 422.895926 | 248.643956 | 20.4707118 | 0          | 177.416084 | 21.4326848 | 458.736359 | 13.8484843 | 34.0674861 | 9.42995208 | 0          | 0          | 0          | 0          | 16.2274558 | 0          | 0          | 127.572282 | 0          | 0          | 0          | 0.00109499 | 0.0993922  |
